# Supplementary material
Source: PubMed Central journal article supplement (PMC7018557)

A

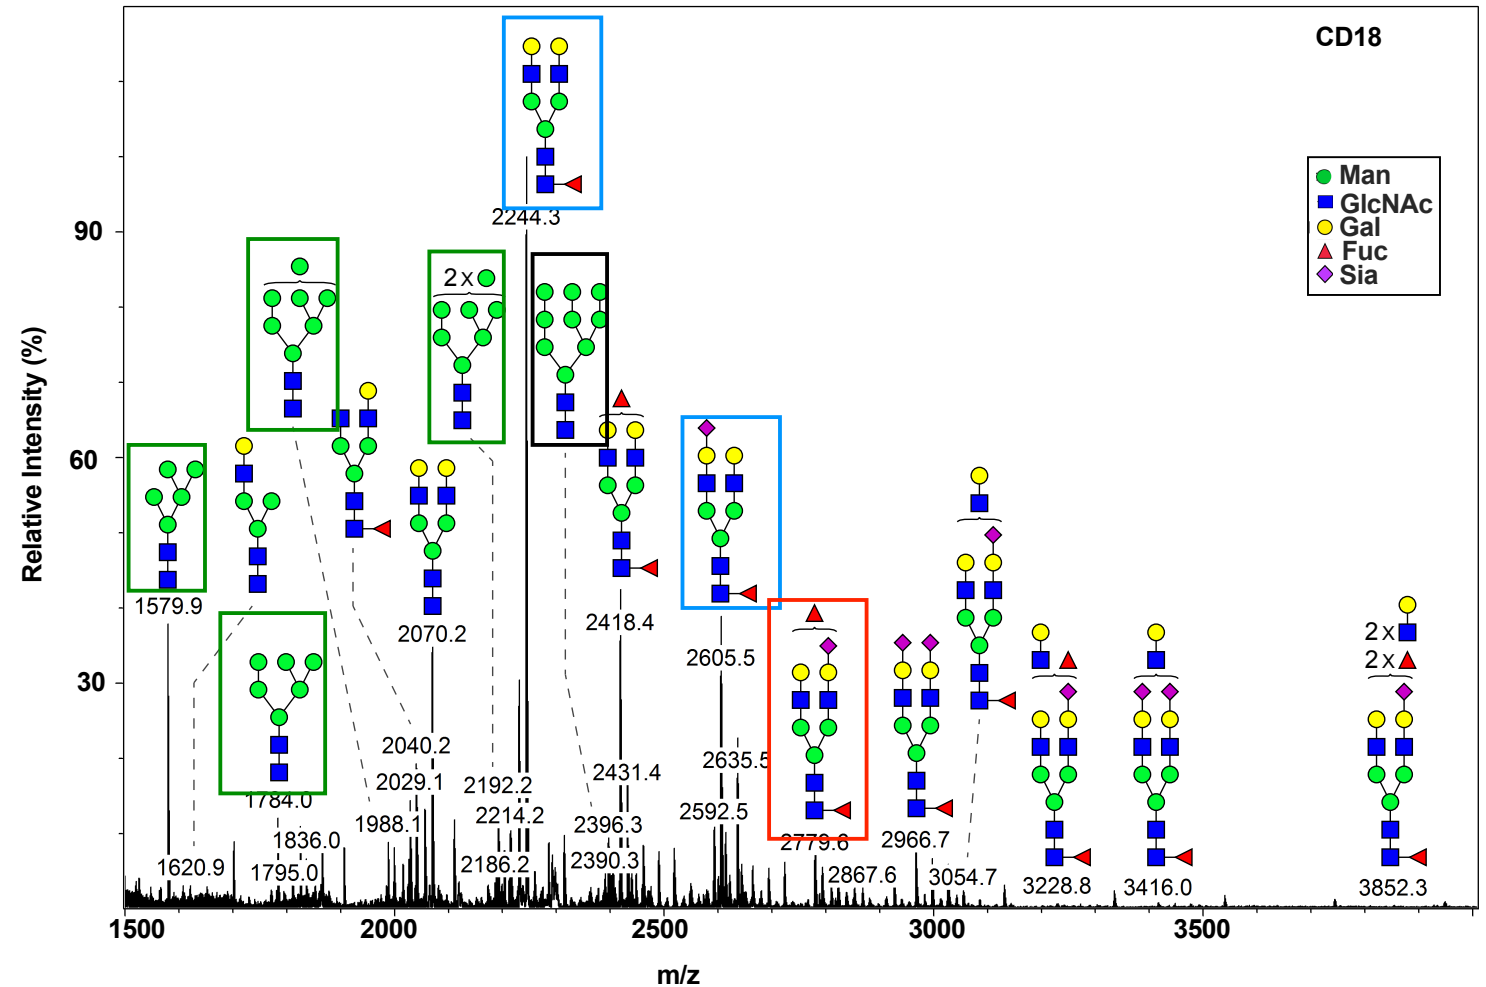

Supplemental Figure 1. N glycan MALDI-TOF profile of human PMN CD18.

Supplement: NIHMS1061542-supplement-Supp_figS1.pdf [file NIHMS1061542-supplement-Supp_figS1.pdf]
